# Supplementary material for: Mn(ii) mediated degradation of artemisinin based on Fe3O4@MnSiO3-FA nanospheres for cancer therapy in vivo
Source: Royal Society of Chemistry journal article supplement (doi:10.1039/c5nr02402a), 2015-01-01
Supplement: c5nr02402a1.pdf [file c5nr02402a1.pdf]

Supporting Information for:

**Mn (II) mediated degradation of artemisinin based on  
Fe<sub>3</sub>O<sub>4</sub>@MnSiO<sub>3</sub>-FA nanospheres for cancer therapy  
*in vivo***

**Jian Chen,<sup>#a</sup> Weijie Zhang,<sup>#b</sup> Min Zhang,<sup>b</sup> Zhen Guo,<sup>\*c</sup> Haibao Wang,<sup>\*d</sup> Mengni He,<sup>a</sup>  
Pengping Xu,<sup>a</sup> Jiajia Zhou,<sup>c</sup> Zhenbang Liu,<sup>c</sup> Qianwang Chen<sup>\*a</sup>**

a. Hefei National Laboratory for Physical Sciences at Microscale, Department of Materials Science & Engineering, CAS High Magnetic Field Laboratory, University of Science and Technology of China, Hefei, 230026, China. E-mail: cqw@ustc.edu.cn; Fax & Fax: +86-551-63603005;

b. Hefei National Laboratory for Physical Sciences at Microscale and School of Life Sciences, University of Science and Technology of China, Hefei, 230027, China;

c. Anhui Key Laboratory for Cellular Dynamics and Chemical Biology, School of Life Sciences, University of Science and Technology of China, Hefei, 230027, China. E-mail: zhenguo@ustc.edu.cn;

d. Radiology Department of the First Affiliated Hospital of Anhui Medical University, Hefei, 230022, China. E-mail: whblqh@mail.ustc.edu.cn.

# These two authors contributed equally

\* Corresponding author

## Supporting Information Figures:

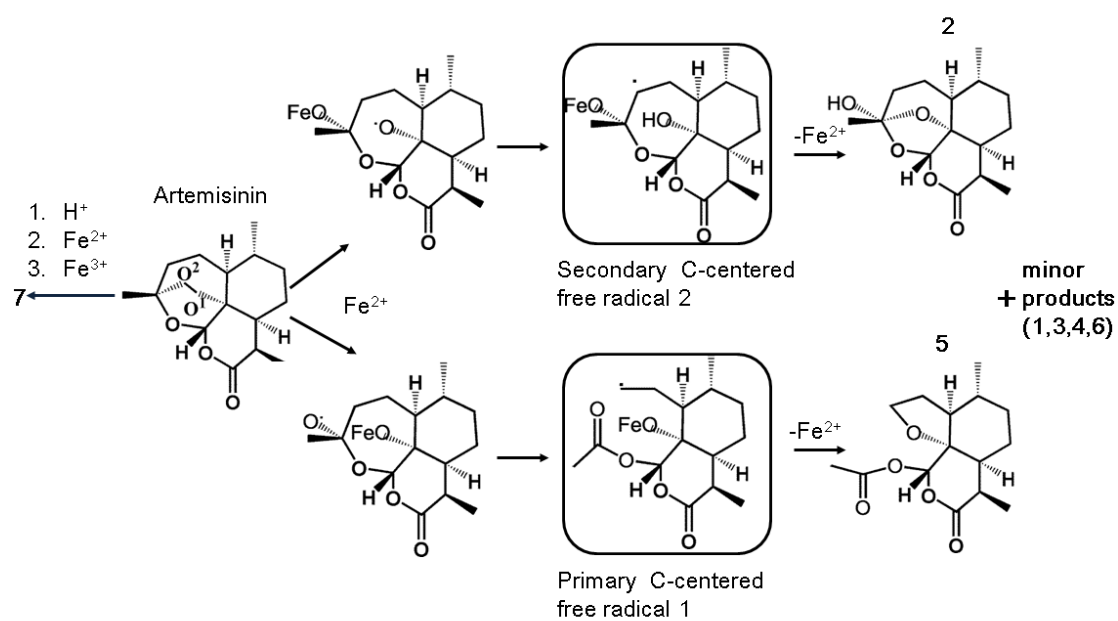

**Figure S1.** Iron mediated degradation mechanism for artemisinin. Products 1, 3, 4, and 6 are minor products of unknown structure observed by LCMS. Product 7 is an acid-mediated degradation product formed by reaction with either  $\text{H}^+$ ,  $\text{Fe}^{3+}$ , or  $\text{Fe}^{2+}$ .

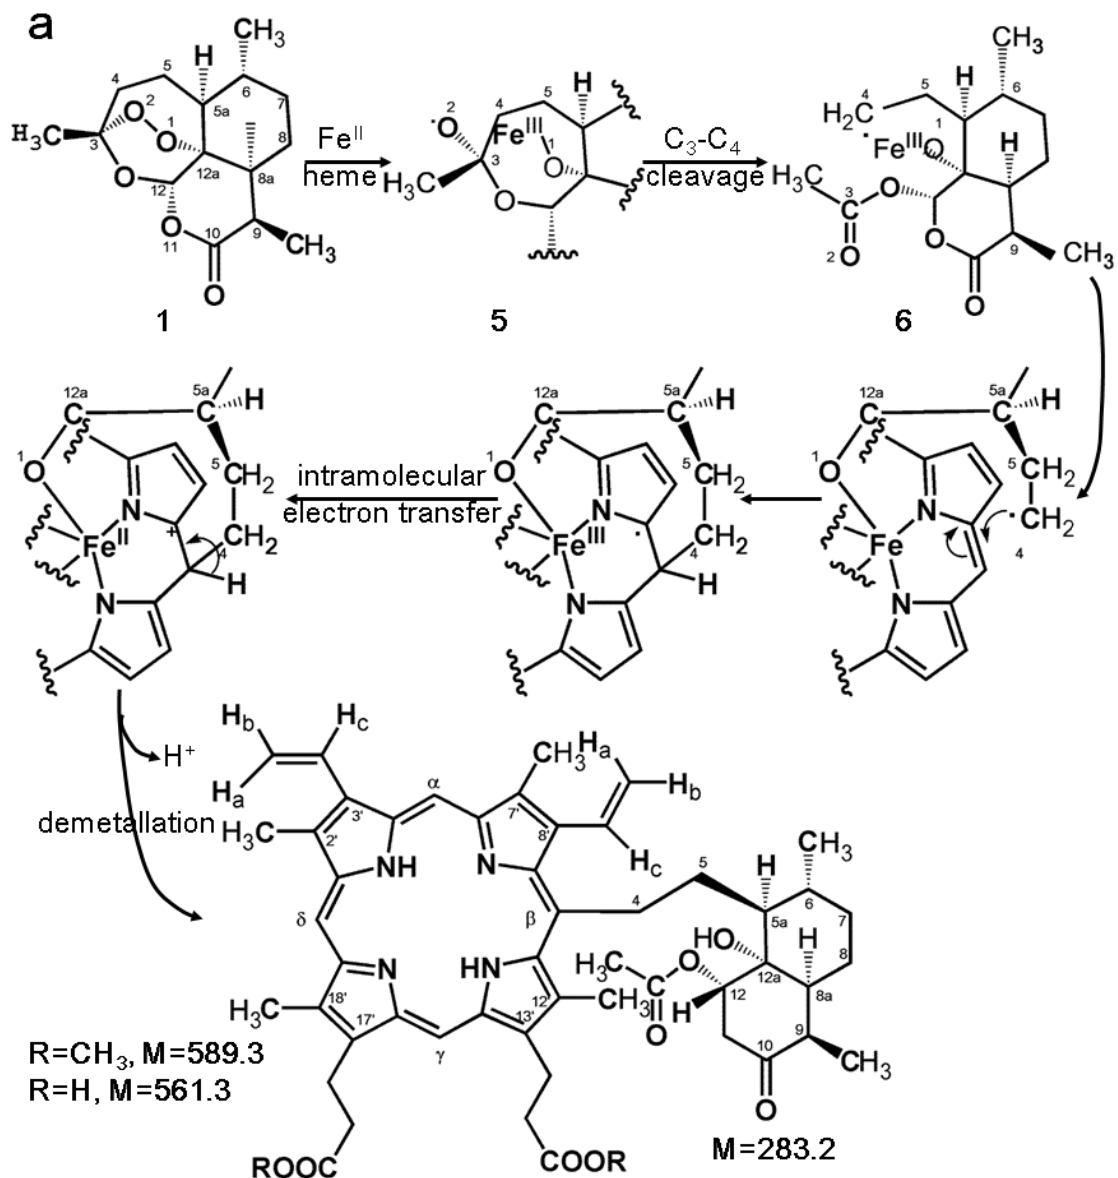

R=CH<sub>3</sub>, H<sub>2</sub>(PPIX)-Art adducts

substitution at  $\alpha$  position 7a

substitution at  $\beta$  position 7b

substitution at  $\gamma$  position 7c

substitution at  $\delta$  position 7d

only 7b is depicted

M=872.5

R=H, H<sub>2</sub>(PPIX)-Art adducts

8a

8b

8c

8d

only 8b is depicted

M=844.6

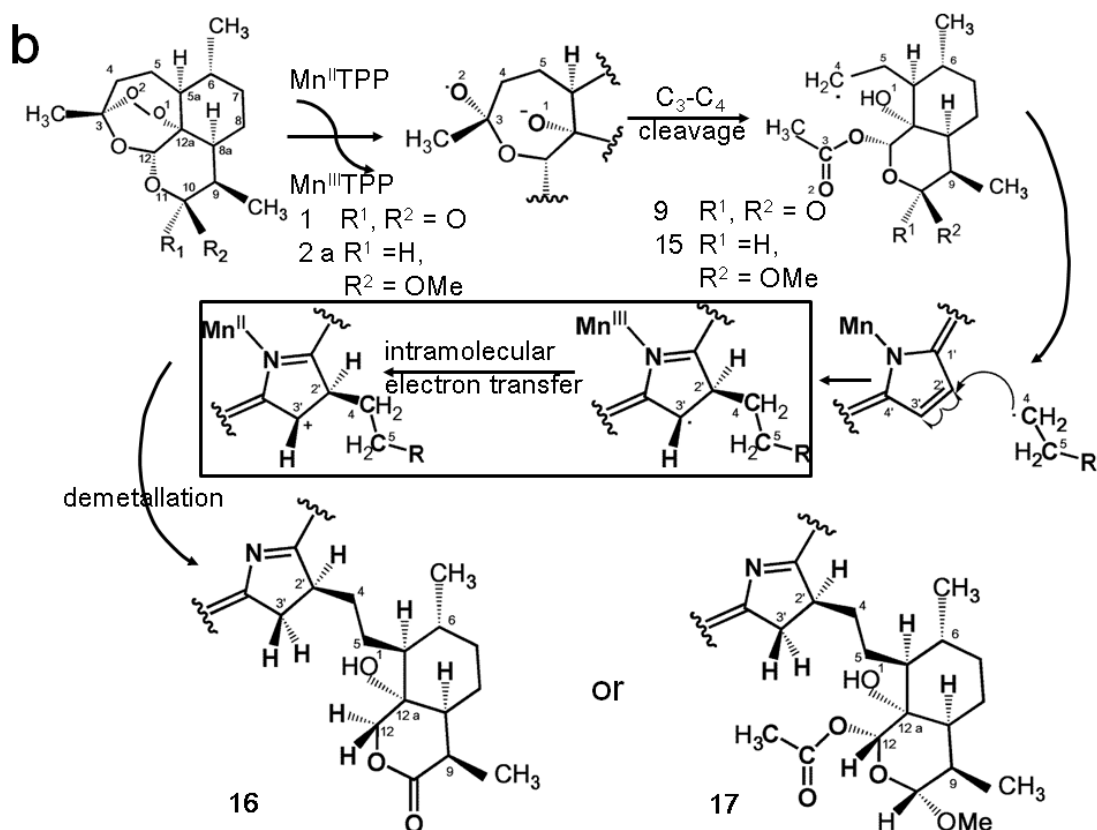

**Figure S2.** (a) Alkylation of iron(II)-heme or iron(II)/heme dimethylester by artemisinin, leading after demetallation to the covalent adducts 7a-d and 8a-d, respectively; (b) Mechanism of alkylation of the heme model  $\text{Mn}^{\text{II}}\text{TPP}$  by artemisinin.

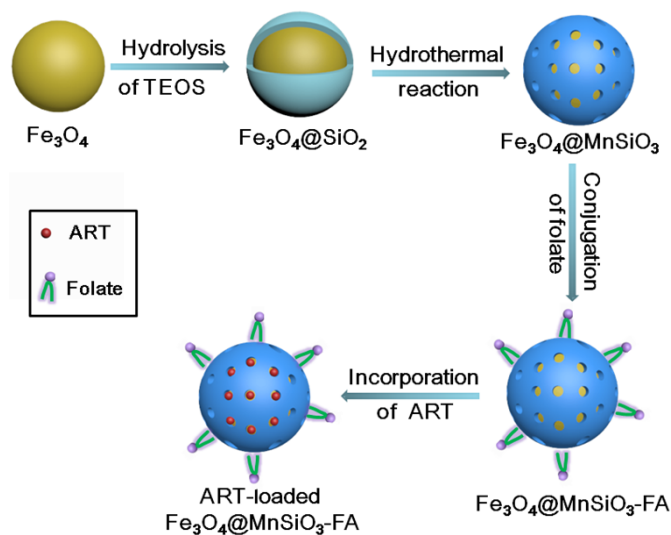

**Figure S3.** Schematic illustration of the synthesis of ART-loaded  $\text{Fe}_3\text{O}_4@\text{MnSiO}_3\text{-FA}$  nanospheres.

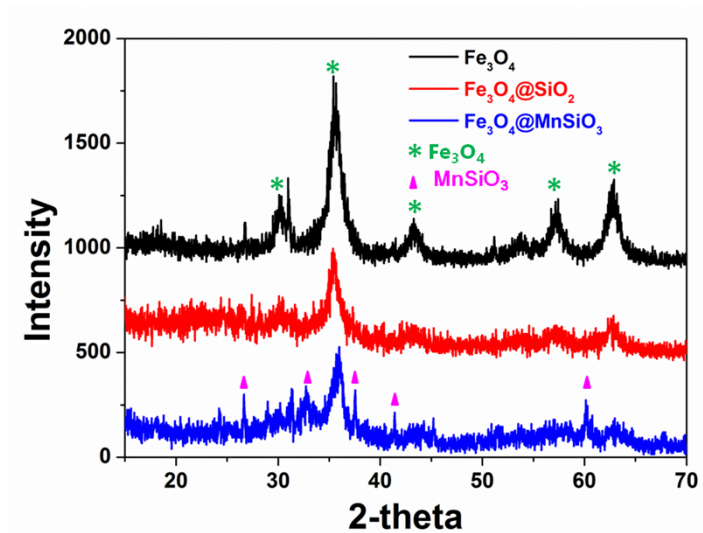

**Figure S4.** X-ray diffraction pattern for the products of Fe<sub>3</sub>O<sub>4</sub>, Fe<sub>3</sub>O<sub>4</sub>@SiO<sub>2</sub> and Fe<sub>3</sub>O<sub>4</sub>@MnSiO<sub>3</sub>.

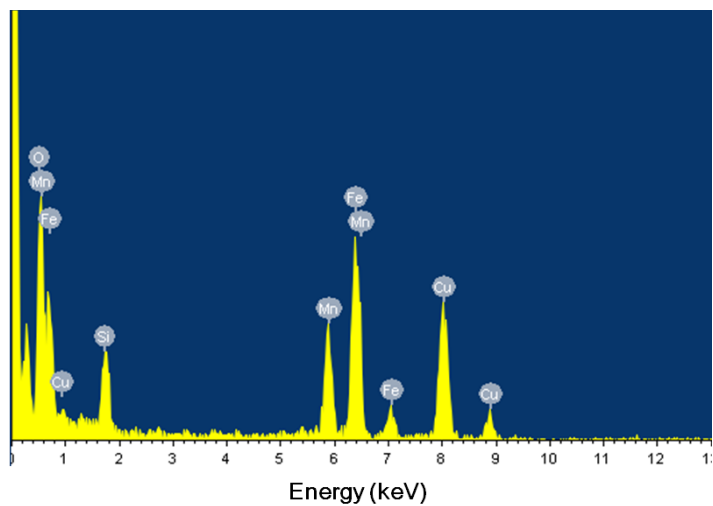

**Figure S5.** EDX spectrum of Fe<sub>3</sub>O<sub>4</sub>@MnSiO<sub>3</sub> nanospheres.

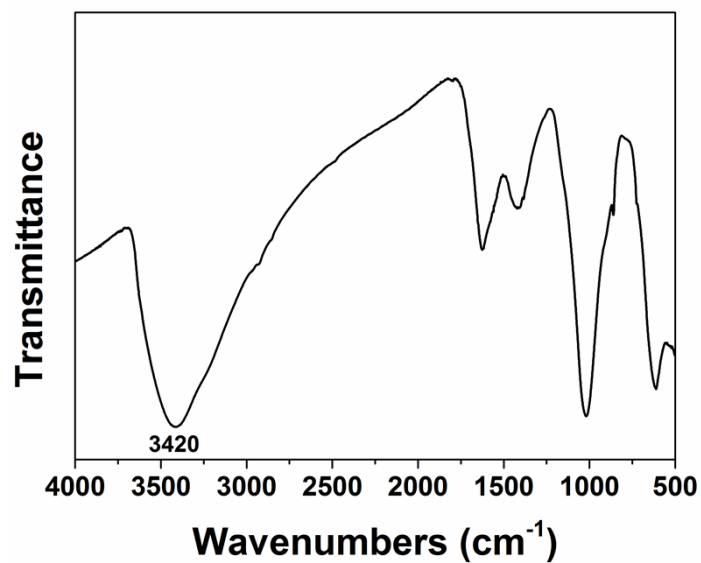

Figure S6. FT-IR spectrum of Fe<sub>3</sub>O<sub>4</sub>@MnSiO<sub>3</sub> nanospheres.

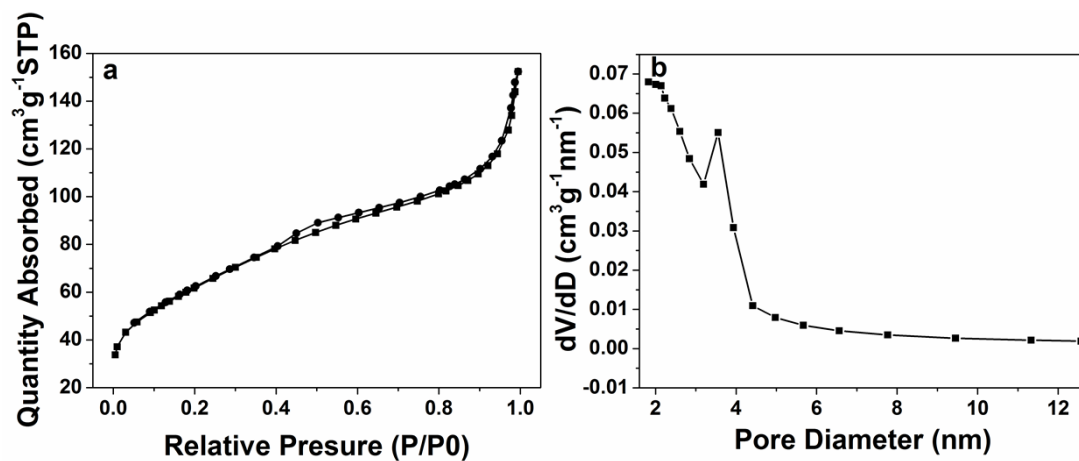

Figure S7. (a) N<sub>2</sub> adsorption and desorption isotherm and (b) BJH pore distribution of Fe<sub>3</sub>O<sub>4</sub>@MnSiO<sub>3</sub> nanospheres.

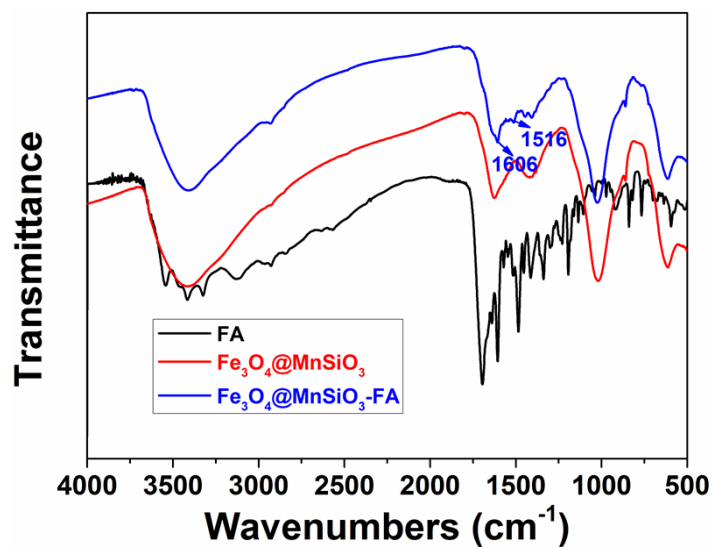

**Figure S8.** FT-IR spectra of FA,  $\text{Fe}_3\text{O}_4@\text{MnSiO}_3$  nanospheres and  $\text{Fe}_3\text{O}_4@\text{MnSiO}_3$ -FA nanospheres.

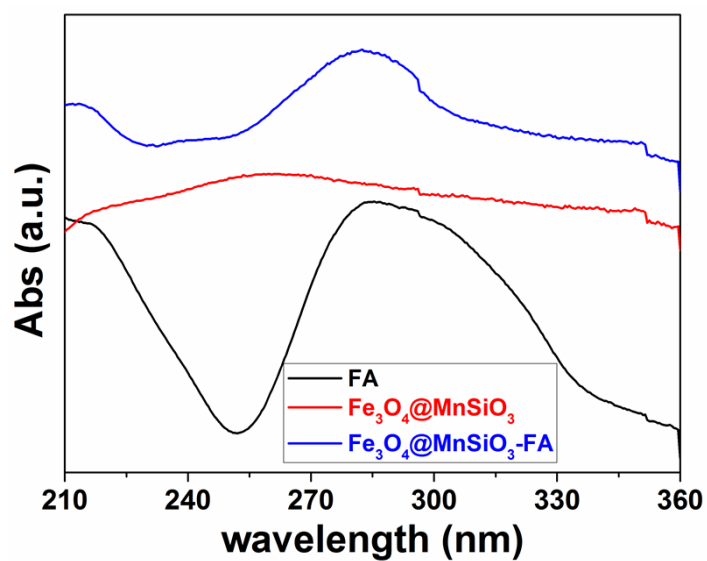

**Figure S9.** UV-vis spectra of FA,  $\text{Fe}_3\text{O}_4@\text{MnSiO}_3$  nanospheres and  $\text{Fe}_3\text{O}_4@\text{MnSiO}_3$ -FA nanospheres.

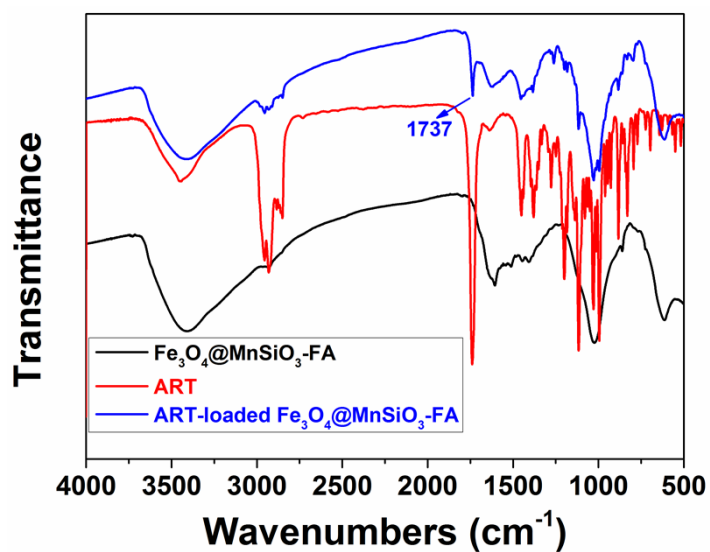

**Figure S10.** FT-IR spectra of standard ART,  $\text{Fe}_3\text{O}_4@\text{MnSiO}_3$ -FA nanospheres and ART-loaded  $\text{Fe}_3\text{O}_4@\text{MnSiO}_3$ -FA nanospheres.

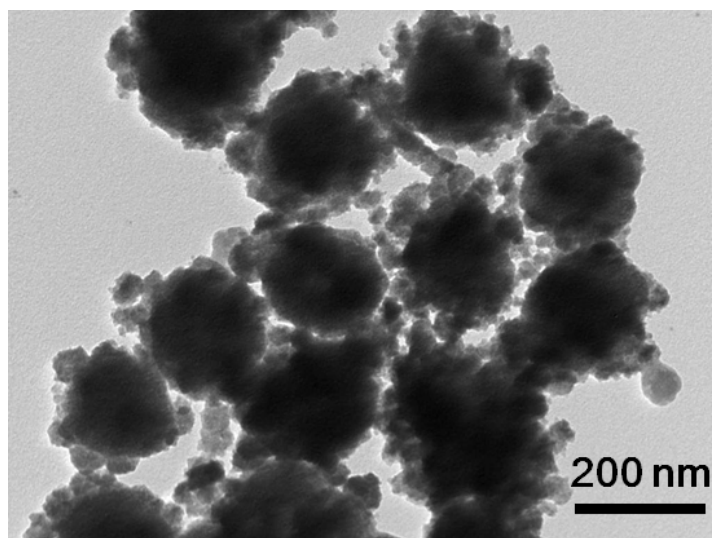

**Figure S11.** TEM images of  $\text{Fe}_3\text{O}_4@\text{MnSiO}_3$  nanospheres kept in PBS with pH 5.5 for 24 h.

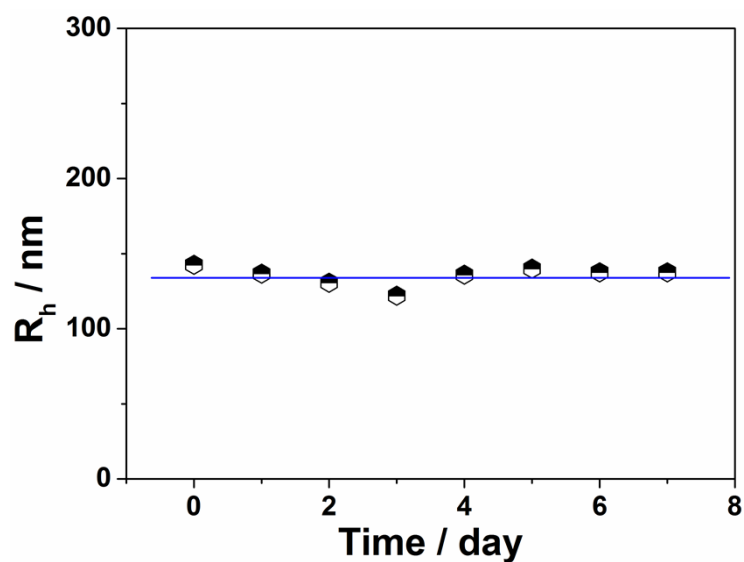

**Figure S12.** In vitro stability of ART-loaded  $\text{Fe}_3\text{O}_4@\text{MnSiO}_3$ -FA nanospheres. The size of the nanospheres in distilled water was measured by a commercial laser light scattering (LLS) spectrometer (ALV/DLS/SLS-5022 F).



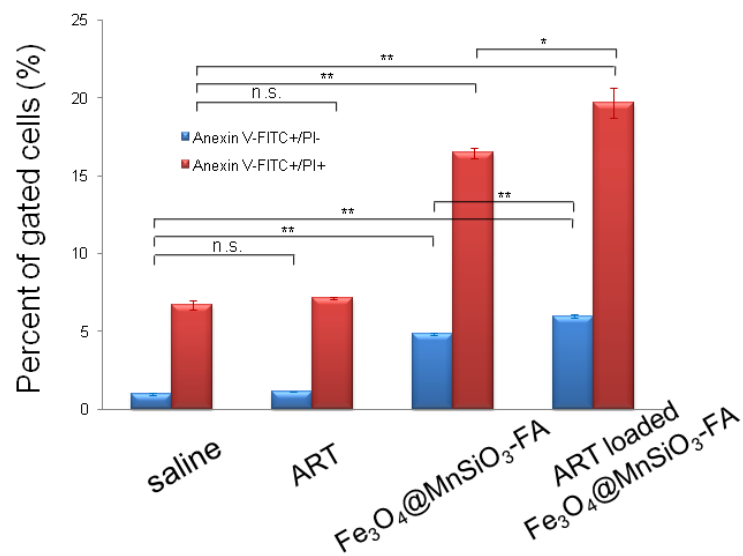

**Figure S13.** Parallel test results of flow cytometric detection in A549 cells treated with (a) saline, (b) ART, (c) Fe<sub>3</sub>O<sub>4</sub>@MnSiO<sub>3</sub>-FA nanospheres and (d) ART-loaded Fe<sub>3</sub>O<sub>4</sub>@MnSiO<sub>3</sub>-FA nanospheres at concentrations of ART 16.5 μg/mL or Fe<sub>3</sub>O<sub>4</sub>@MnSiO<sub>3</sub>-FA nanospheres 75 μg/mL. n.s., not significant; \*, p<0.05; \*\*, p<0.001.

**Supporting Information Table:**

|                                     | pH 7.4       | pH 6.8       | pH 5.5       |
|-------------------------------------|--------------|--------------|--------------|
| <b>Released Fe<sup>2+</sup> (%)</b> | <b>0.033</b> | <b>0.084</b> | <b>0.12</b>  |
| <b>Released Mn<sup>2+</sup> (%)</b> | <b>0.92</b>  | <b>3.53</b>  | <b>12.59</b> |

**Table S1.** Fe<sup>2+</sup> or Mn<sup>2+</sup> release from Fe<sub>3</sub>O<sub>4</sub>@MnSiO<sub>3</sub> nanospheres in PBS at different pHs (7.4, 6.8, 5.5).
